# Supplementary material
Source: MDPI journal article supplement (https://www.mdpi.com/2071-1050/12/15/6166)

**Figure S1.** Calibration result (performance certificate and test result)

|                                                                                                                                                                                                                                                                                                                                                                    |                                                                                                        |                                                                 |
|--------------------------------------------------------------------------------------------------------------------------------------------------------------------------------------------------------------------------------------------------------------------------------------------------------------------------------------------------------------------|--------------------------------------------------------------------------------------------------------|-----------------------------------------------------------------|
| Certificate No. KTR-2020-25                                                                                                                                                                                                                                                                                                                                        |                                                                                                        |                                                                 |
| <b>PERFORMANCE CERTIFICATE</b>                                                                                                                                                                                                                                                                                                                                     |                                                                                                        |                                                                 |
| Company Name<br>(Business Establishment)                                                                                                                                                                                                                                                                                                                           | BRILLIANT & COMPANY CO., LTD                                                                           |                                                                 |
| Name<br>(CEO)                                                                                                                                                                                                                                                                                                                                                      | JUNGYON YUN                                                                                            |                                                                 |
| Location of business<br>establishment                                                                                                                                                                                                                                                                                                                              | H-1-912D, 5, Hwarang-ro 14-gil, Seongbuk-gu, Seoul, Republic of Korea<br>(Phone Number : 02-6959-5538) |                                                                 |
| Authorized Contents                                                                                                                                                                                                                                                                                                                                                | Manufacturer                                                                                           | Producing Nation                                                |
|                                                                                                                                                                                                                                                                                                                                                                    | BRILLIANT & COMPANY CO., LTD                                                                           | Republic of Korea                                               |
|                                                                                                                                                                                                                                                                                                                                                                    | Device Name                                                                                            | Measuring Method                                                |
|                                                                                                                                                                                                                                                                                                                                                                    | Fine Dust Simple Meter                                                                                 | Laser scattering                                                |
|                                                                                                                                                                                                                                                                                                                                                                    | Product Name(distinguished name)                                                                       | Measuring Range                                                 |
|                                                                                                                                                                                                                                                                                                                                                                    | PiCOHOME(PMM-130)                                                                                      | Minimum : 5 µg/m <sup>3</sup><br>Maximum : 200µg/m <sup>3</sup> |
| Minimum Gradation(Unit)                                                                                                                                                                                                                                                                                                                                            | Accredited Measurement Error Range                                                                     |                                                                 |
| 1 µg/m <sup>3</sup>                                                                                                                                                                                                                                                                                                                                                | Accuracy : 86.2 %                                                                                      |                                                                 |
| Performance Certification Rating<br>The first class                                                                                                                                                                                                                                                                                                                |                                                                                                        |                                                                 |
| <p>Performance certificate shall be issued as above in accordance with the Article 24(1) of 「Special Act on Fine Dust Reduction &amp; Management」 and Article 16(3) of the Enforcement Rules of the same Act.</p> <p style="text-align: right;">April 3, 2020</p> <p style="text-align: center;"><b>KTR</b> Head of KOREA TESTING<br/>&amp; RESEARCH INSTITUTE</p> |                                                                                                        |                                                                 |

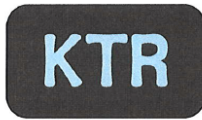

## TEST REPORT

98 Kyoyukwon-ro Gwacheon-si, Gyeonggi-do Zip code 13810 TEL(02)2164-0011 FAX(02)2634-1008

Test Report No : TBK-2019-008372 Reception Date Dec. 3, 2019  
 CEO : JUNGYON YUN Test completion date Apr. 3, 2020  
 Company Name : BRILLIANT & COMPANY CO., LTD  
 Address : H-1-912d, 5, Hwarang-ro 14-gil, Seongbuk-gu, Seoul, Republic of Korea

Sample Name Performance certification of Fine Dust Simple Meter

### Results of Test

| Test Item                    | Unit | Sample Classification | Result Value | Measuring Method                                    |
|------------------------------|------|-----------------------|--------------|-----------------------------------------------------|
| Repetitive reconstruction    | %    | -                     | 82.9         | Performance certification of fine dust simple meter |
| Relative precision           | %    | -                     | 95.8         | Performance certification of fine dust simple meter |
| Data acquisition rate        | %    | -                     | 100          | Performance certification of fine dust simple meter |
| Accuracy                     | %    | -                     | 86.2         | Performance certification of fine dust simple meter |
| Coefficient of determination | -    | -                     | 0.95         | Performance certification of fine dust simple meter |

Performance Certification No. : KTR-2020-25

Model Name : PiCOHOME(PMM-130)

-Purpose : For quality control

- Note : 1. This report is a result of testing with samples and sample names presented by the client and does not guarantee the quality of the entire product. The authenticity of the report can be verified by the Homepage([www.ktr.or.kr](http://www.ktr.or.kr)) or QR code.
2. This report shall not be used for publicity, propaganda, advertising or litigation and shall not be used for any other purpose.
3. This report is valid only in the original(including reissue), and copies and electronic prints/files are for reference.

Writer : MOOHYUN JUNG  
 Tel : 02-2092-3825

Technical Officer : CHANGSJK JUNG  
 Tel : 1577-0091(ARS ①→④)

April 3, 2020

**KTR** Head of KOREA TESTING  
 RESEARCH INSTITUTE

**KTR** KOREA TESTING &  
 RESEARCH INSTITUTE

**Figure S2.** Time-series plot for PM<sub>10</sub> concentrations and MiBP for participant G (similar pattern to Figure 1(a))

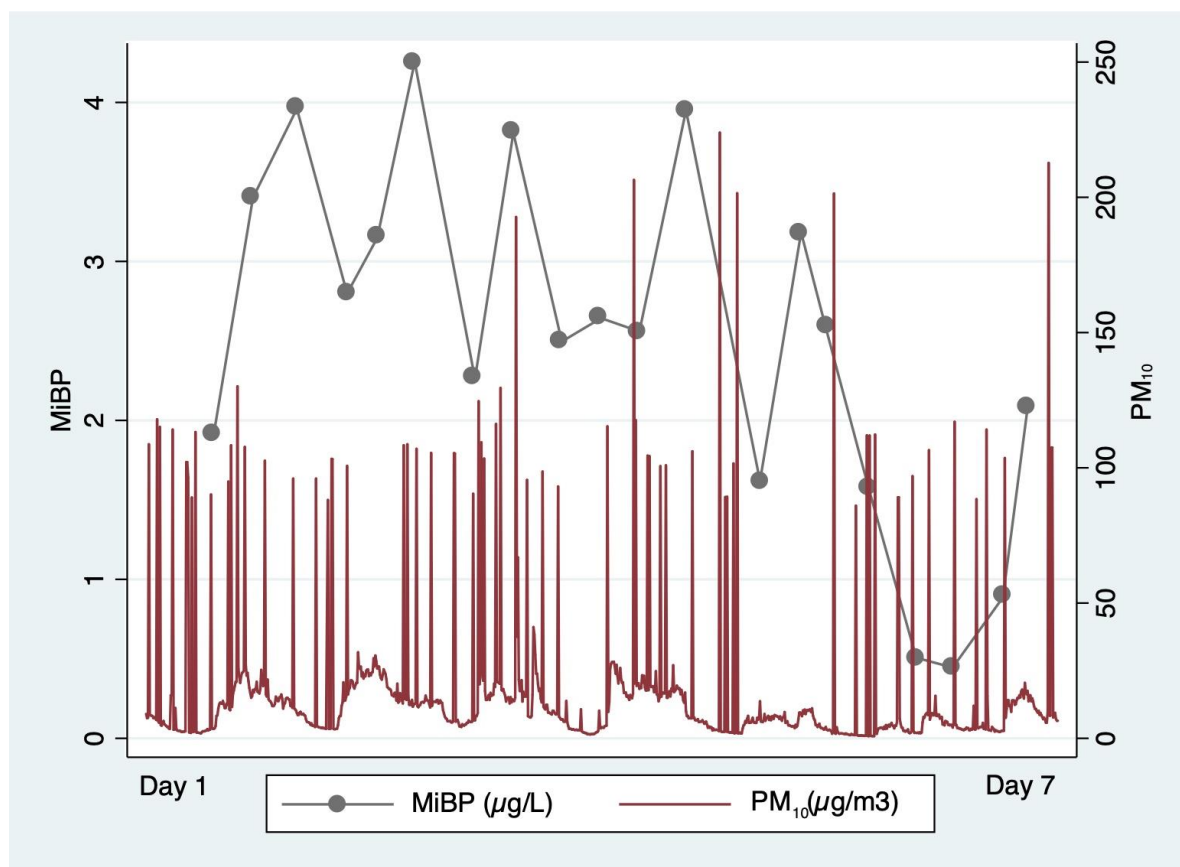

Supplement: s1 [file s1]
